# Supplementary material for: Dithiocarbazate-copper complex loaded thermosensitive hydrogel for lung cancer therapy via tumor in situ sustained-release
Source: Royal Society of Chemistry journal article supplement (doi:10.1039/d2qi01383e), 2022-01-01
Supplement: d2qi01383e1.pdf [file d2qi01383e1.pdf]

## Supporting information for

### **Dithiocarbazate-Copper Complex Loaded Thermosensitive Hydrogel for Lung Cancer Therapy via Tumor in situ Sustained-Release**

*JunGang Deng<sup>a, 1</sup>, Chang Peng<sup>a, b, 1</sup>, Li Xia Hou<sup>a, 1</sup>, You Ru Wu<sup>a</sup>, Wei Liu<sup>c</sup>, GuiHua Fang<sup>c</sup>,*

*Hao Wen Jiang<sup>d</sup>, ShanFu Qin<sup>e</sup>, Feng Yang<sup>f</sup>, GuoJin Huang<sup>a\*</sup>, Yi Gou<sup>a\*</sup>*

<sup>a</sup> The Laboratory of Respiratory Disease, Guilin Medical University, Guilin 541001, Guangxi, China.

<sup>b</sup> State Key Laboratory of Drug Research and, CAS Key Laboratory of Receptor Research, Shanghai Institute of Materia Medica, Chinese Academy of Sciences, 555 Zu Chong Zhi Road, Shanghai, 201203, China.

<sup>c</sup> School of Pharmacy, Nantong University, Nantong 226019, Jiangsu, China.

<sup>d</sup> University of Chinese Academy of Science, No. 19A Yuquan Road, Beijing, 100049, China.

<sup>e</sup> Hechi University, Hechi 546300, Guangxi, China.

<sup>f</sup> School of Chemistry and Pharmaceutical Sciences, Guangxi Normal University, Guilin, 541004, Guangxi, China.

## Table of Contents

|                                                                                                                   |    |
|-------------------------------------------------------------------------------------------------------------------|----|
| <b>Figure S1.</b> Cytotoxic profiles of the complexes against different lung cancer cell lines at 48 h. ....      | S3 |
| <b>Table S1.</b> Selected angles [ $^{\circ}$ ] and bond lengths [ $\text{\AA}$ ] in these copper complexes. .... | S4 |

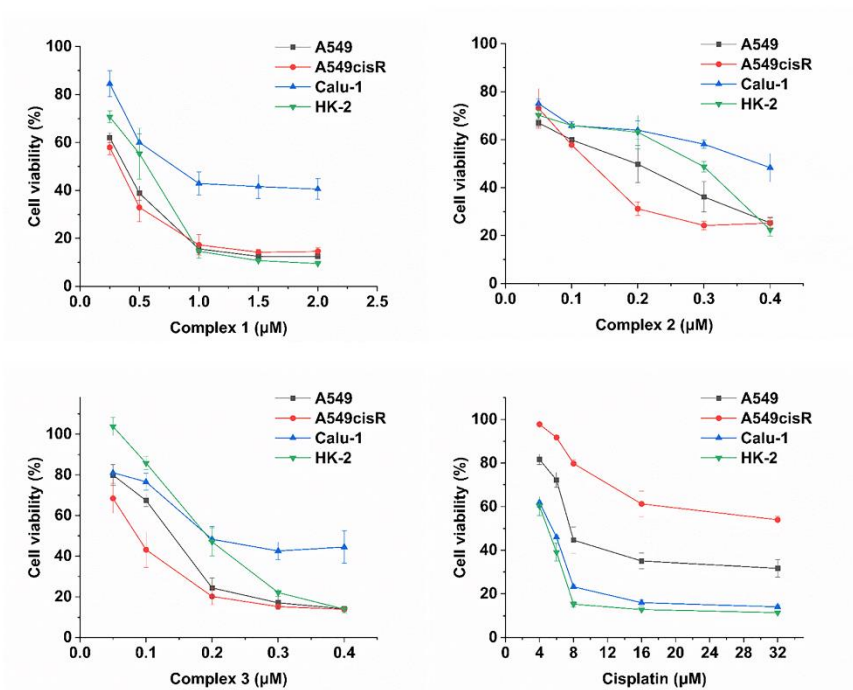

**Figure S1** Cytotoxic profiles of the complexes against different lung cancer cell lines at 48 h.

**Table S1** Selected angles [°] and bond lengths [Å] in these copper complexes.

---

| <b>1</b>    |            |             |            |
|-------------|------------|-------------|------------|
| Br1–Cu1     | 2.3502(3)  | N2–Cu1–Br1  | 179.01(5)  |
| Cu1–S2      | 2.2517(6)  | N2–Cu1–S2   | 84.46(5)   |
| Cu1–N2      | 1.9582(16) | N2–Cu1–N3   | 79.91(6)   |
| Cu1–N3      | 2.0339(16) | N3–Cu1–Br1  | 99.21(5)   |
| S2–Cu1–Br1  | 96.453(17) | N3–Cu1–S2   | 163.27(5)  |
| <b>2</b>    |            |             |            |
| Br1–Cu1     | 2.3811(5)  | N2–Cu1–Br1  | 176.21(6)  |
| Cu1–S2      | 2.2519(9)  | N2–Cu1–S2   | 84.98(7)   |
| Cu1–N2      | 1.970(2)   | N2–Cu1–N3   | 80.03(9)   |
| Cu1–N3      | 2.019(2)   | N3–Cu1–Br1  | 97.81(6)   |
| S2–Cu1–Br1  | 96.95(3)   | N3–Cu1–S2   | 164.55(6)  |
| <b>3</b>    |            |             |            |
| Br2–Cu3     | 2.4732(10) | S4–Cu3–Br2  | 91.91(5)   |
| Br2–Cu2     | 2.5289(10) | N5–Cu3–Br2  | 141.96(15) |
| Br1–Cu1     | 2.4124(10) | N5–Cu3–S4   | 84.84(15)  |
| Br3–Cu2     | 2.3650(11) | N6–Cu3–Br2  | 96.50(15)  |
| Cu3–S4      | 2.2798(15) | N6–Cu3–S4   | 169.10(16) |
| Cu3–N5      | 1.981(5)   | S2–Cu1–Br1  | 88.80(5)   |
| Cu3–N6      | 2.010(5)   | N3–Cu1–Br1  | 97.61(14)  |
| Cu1–S2      | 2.2544(16) | N3–Cu1–S2   | 167.49(15) |
| Cu1–N3      | 2.008(5)   | N2–Cu1–Br1  | 159.51(15) |
| Cu1–N2      | 1.980(5)   | N2–Cu1–S2   | 85.51(15)  |
| Cu2–S4      | 2.3923(17) | N2–Cu1–N3   | 91.9(2)    |
| Cu2–S2      | 2.3039(17) | Br3–Cu2–Br2 | 113.46(4)  |
| Cu3–Br2–Cu2 | 77.96(3)   | Br3–Cu2–S4  | 112.60(5)  |

---
